# Supplementary material for: Changes in Attitudes and Beliefs Concerning Vaccination and Influenza Vaccines between the First and Second COVID-19 Pandemic Waves: A Longitudinal Study
Source: Vaccines (Basel). 2021 Sep 13;9(9):1016. doi: 10.3390/vaccines9091016 (PMC8470379; doi:10.3390/vaccines9091016)
Supplement: Supplementary file 1 [file vaccines-09-01016-s001.zip › vaccines-1349309-supplementary.pdf]

**Table S1.** Survey Instrument.

| Item                                                                                                                      | 2020 survey | 2021 survey |
|---------------------------------------------------------------------------------------------------------------------------|-------------|-------------|
| Did you have a flu shot in the last season?                                                                               |             |             |
| - I have never had a flu shot;                                                                                            |             |             |
| - I had a flu shot in the past, but not in the last season;                                                               | Yes         | Yes         |
| - I had a flu shot in the last season for the first time;                                                                 |             |             |
| - I had a flu shot both in the last season and sometimes in the past.                                                     |             |             |
| To what extent do you agree or disagree with the following statement?                                                     |             |             |
| Vaccines are a fraud designed to profit the pharmaceutical companies.                                                     |             |             |
| - Strongly agree;                                                                                                         | Yes         | Yes         |
| - More agree than disagree;                                                                                               |             |             |
| - More disagree than agree;                                                                                               |             |             |
| - Strongly disagree.                                                                                                      |             |             |
| To what extent do you agree or disagree with the following statement?                                                     |             |             |
| Vaccines are crucial to guaranteeing public health and should be mandatory.                                               |             |             |
| - Strongly agree;                                                                                                         | Yes         | Yes         |
| - More agree than disagree;                                                                                               |             |             |
| - More disagree than agree;                                                                                               |             |             |
| - Strongly disagree.                                                                                                      |             |             |
| To what extent do you agree or disagree with the following statement?                                                     |             |             |
| All vaccines are safe.                                                                                                    |             |             |
| - Strongly agree;                                                                                                         | No          | Yes         |
| - More agree than disagree;                                                                                               |             |             |
| - More disagree than agree;                                                                                               |             |             |
| - Strongly disagree.                                                                                                      |             |             |
| To what extent do you agree or disagree with the following statement?                                                     |             |             |
| I need more information on vaccines.                                                                                      |             |             |
| - Strongly agree;                                                                                                         | Yes         | Yes         |
| - More agree than disagree;                                                                                               |             |             |
| - More disagree than agree;                                                                                               |             |             |
| - Strongly disagree.                                                                                                      |             |             |
| To what extent do you agree or disagree with the following statement?                                                     |             |             |
| Influenza vaccination is a human right and must be guaranteed for people that would like to have it.                      |             |             |
| - Strongly agree;                                                                                                         | Yes         | Yes         |
| - More agree than disagree;                                                                                               |             |             |
| - More disagree than agree;                                                                                               |             |             |
| - Strongly disagree.                                                                                                      |             |             |
| To what extent do you agree or disagree with the following statement?                                                     |             |             |
| It is unacceptable that there are no influenza vaccines in the future season for people that would like to be vaccinated. |             |             |
| - Strongly agree;                                                                                                         | Yes         | Yes         |
| - More agree than disagree;                                                                                               |             |             |
| - More disagree than agree;                                                                                               |             |             |
| - Strongly disagree.                                                                                                      |             |             |
| To what extent do you agree or disagree with the following statement?                                                     |             |             |
| If there were no a free-of-charge influenza vaccine, I would pay for it out of my own pocket.                             |             |             |
| - Strongly agree;                                                                                                         | Yes         | Yes         |
| - More agree than disagree;                                                                                               |             |             |
| - More disagree than agree;                                                                                               |             |             |
| - Strongly disagree.                                                                                                      |             |             |
| To what extent do you agree or disagree with the following statement?                                                     |             |             |
| There are different influenza vaccine types.                                                                              |             |             |
| - Strongly agree;                                                                                                         | Yes         | Yes         |
| - More agree than disagree;                                                                                               |             |             |
| - More disagree than agree;                                                                                               |             |             |
| - Strongly disagree.                                                                                                      |             |             |
| To what extent do you agree or disagree with the following statement?                                                     |             |             |
| I would be more willing to get a flu shot if it were personalized.                                                        | Yes         | Yes         |
| - Strongly agree;                                                                                                         |             |             |
| - More agree than disagree;                                                                                               |             |             |

|                                                                                                                                                          |     |     |
|----------------------------------------------------------------------------------------------------------------------------------------------------------|-----|-----|
| - More disagree than agree;                                                                                                                              |     |     |
| - Strongly disagree.                                                                                                                                     |     |     |
| Regarding influenza vaccination, on a scale from 1 (not at all) to 10 (completely) how much do you trust information from each of the following sources? |     |     |
| - Friends and acquaintances;                                                                                                                             |     |     |
| - My physician;                                                                                                                                          | Yes | Yes |
| - My pharmacist;                                                                                                                                         |     |     |
| - Public health institutions;                                                                                                                            |     |     |
| - TV/newspapers;                                                                                                                                         |     |     |
| - Social networks.                                                                                                                                       |     |     |
| Do you intend to have a flu shot in the upcoming season?                                                                                                 |     |     |
| - Yes definitely;                                                                                                                                        |     |     |
| - Probably yes;                                                                                                                                          | Yes | Yes |
| - I don't know;                                                                                                                                          |     |     |
| - Probably not;                                                                                                                                          |     |     |
| - Definitely not.                                                                                                                                        |     |     |
| What are the main reasons why you would not get a flu shot? Select up to 2 of the following:                                                             |     |     |
| - Influenza vaccines do not work;                                                                                                                        |     |     |
| - I had a flu shot but got a fever/cold anyway;                                                                                                          |     |     |
| - I'm afraid of needles;                                                                                                                                 |     |     |
| - Influenza vaccines are designed only to profit the pharmaceutical companies;                                                                           | Yes | Yes |
| - My doctor advised against it;                                                                                                                          |     |     |
| - Flu has diminished drastically since the COVID-19 pandemic began, so I don't think it is necessary any more; <sup>a</sup>                              |     |     |
| - Other.                                                                                                                                                 |     |     |
| If there were an influenza vaccine shortage during the next season, whose fault it would be? Select up to 2 of the following:                            |     |     |
| - Ministry of Health;                                                                                                                                    |     |     |
| - Pharmaceutical companies;                                                                                                                              |     |     |
| - Regional authorities;                                                                                                                                  | Yes | Yes |
| - Local health units;                                                                                                                                    |     |     |
| - Pharmacies;                                                                                                                                            |     |     |
| - Wholesalers; <sup>a</sup>                                                                                                                              |     |     |
| - Other.                                                                                                                                                 |     |     |
| Have you been vaccinated against COVID-19?                                                                                                               |     |     |
| - Yes;                                                                                                                                                   |     |     |
| - Not yet, but I have already booked my shot;                                                                                                            | No  | Yes |
| - Not yet, but I will get a shot as soon as possible;                                                                                                    |     |     |
| - No, and I don't intend to get a shot in the future.                                                                                                    |     |     |
| If it were possible, would you have both the COVID-19 and flu shots at the same time?                                                                    |     |     |
| - Totally agree;                                                                                                                                         |     |     |
| - Agree;                                                                                                                                                 | No  | Yes |
| - Disagree;                                                                                                                                              |     |     |
| - Totally disagree.                                                                                                                                      |     |     |
| What do you think of the idea of having a combined COVID-Flu vaccine?                                                                                    |     |     |
| - Strongly agree;                                                                                                                                        |     |     |
| - More agree than disagree;                                                                                                                              |     |     |
| - Neither agree nor disagree;                                                                                                                            | No  | Yes |
| - More disagree than agree;                                                                                                                              |     |     |
| - Strongly disagree.                                                                                                                                     |     |     |

<sup>a</sup>This response option was available only in the 2021 survey
